# Supplementary material
Source: PubMed Central journal article supplement (PMC4432138)
Supplement: AAC.00047-15_zac006153993so1.pdf [file AAC.00047-15_zac006153993so1.pdf]

1 **Supplementary Appendix**

2

3 **CARB-17 family of  $\beta$ -lactamases mediated intrinsic resistance to penicillins in *Vibrio***  
4 ***parahaemolyticus***

5

6 Jiachi Chiou<sup>1,2</sup>, Ruichao Li<sup>1,2</sup>, Sheng Chen<sup>1,2\*</sup>

7

8 <sup>1</sup> Shenzhen Key Lab for Food Biological Safety Control, Food Safety and Technology  
9 Research Center, Hong Kong PolyU Shenzhen Research Institute, Shenzhen, China;

10 <sup>2</sup>State Key Laboratory of Chirosciences, Department of Applied Biology and Chemical  
11 Technology, The Hong Kong Polytechnic University, Hong Kong, China;

12

13 \*Correspondence: Sheng Chen, Department of Applied Biology and Chemical  
14 Technology, The Hong Kong Polytechnic University, Hung Hom. Kowloon, Hong Kong,  
15 China; Email: [sheng.chen@polyu.edu.hk](mailto:sheng.chen@polyu.edu.hk)

16

17

18

19

20

21

22

23

24

25

26

27

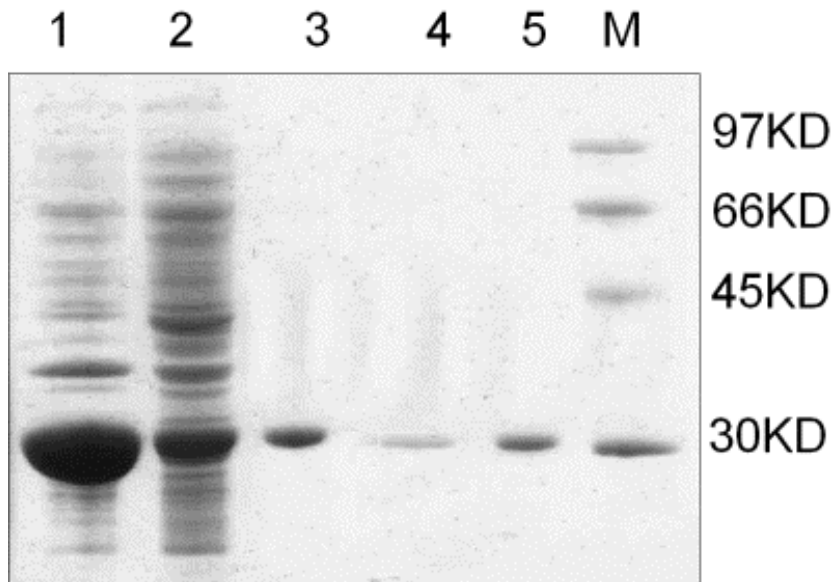

28 **Supplementary Figure 1. Purification of mBla<sub>V110</sub>.** *E. coli* expressing His-mBla<sub>V110</sub>

29 was broken by French press and separated as the insoluble fraction (lane 1) and soluble

30 fraction (lane 2). His-mBla<sub>V110</sub> was purified via the Ni-NTA column (lane 3), treated with

31 thrombin to remove the His tag (lane 4) and followed by size exclusion column (lane 5).

32 M: molecular marker.

33

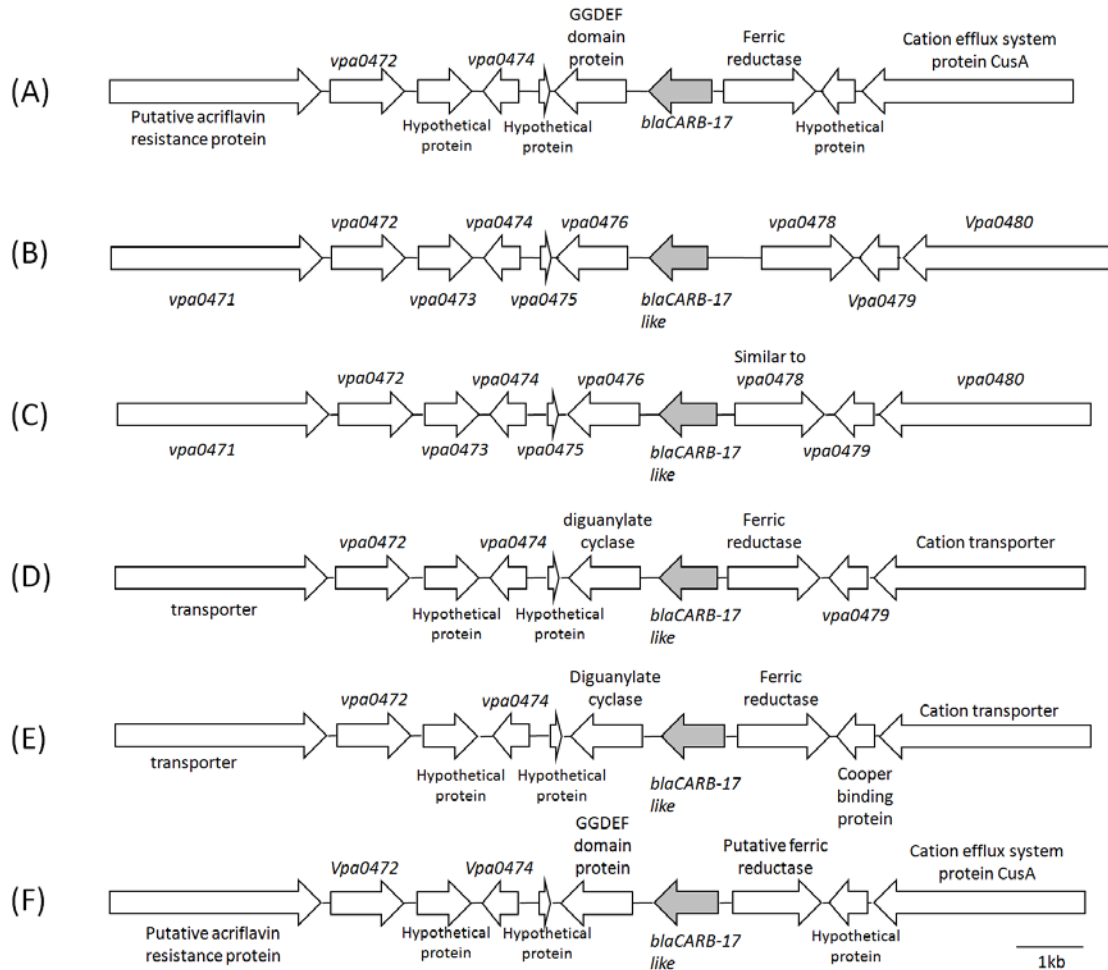

34

35 **Figure 2. Comparison of genetic backgrounds of *bla*<sub>CARB-17</sub> and *bla*<sub>CARB-17-like</sub> genes**

36 **from different *V. parahaemolyticus* strains.** (A) *V. parahaemolyticus* V110

37 chromosome 2; (B) *V. parahaemolyticus* RIMD 2210633 chromosome 2; (C) *V.*

38 *parahaemolyticus* BB22OP chromosome 2; (D) *V. parahaemolyticus* O1:K33 str.

39 CDC\_K4557 chromosome 2; (E) *V. parahaemolyticus* O1:Kuk str. FDA\_R31

40 chromosome 2; (F) *V. parahaemolyticus* UCM-V493 chromosome 2. *Vpa0471*:

41 multidrug efflux membrane fusion protein; *Vpa0472*: long-chain fatty acid transport

42 protein; *Vpa0473*: hypothetical protein; *Vpa0474*: spermidine n1-acetyltransferase;

43 *Vpa0475*: hypothetical protein (GGDEF family protein with GAF sensor); *Vpa0476*:

- 44 hypothetical protein; *Vpa0477*:  $\beta$ -lactamase; *Vpa0478*: oxidoreductase; *Vpa0479*:
- 45 hypothetical protein; *Vpa0480*: cation efflux system transmembrane protein.
